# Supplementary material for: On-Pump versus Off-Pump CABG
Source: Atypon-hosted journal article supplement (doi:10.1056/nejmc0912190), 2010-03-03
Supplement: nejm_shroyer_853sa1.pdf [file nejm_shroyer_853sa1.pdf]

## Supplementary Appendix

This appendix has been provided by the authors to give readers additional information about their work.

Supplement to: Shroyer ALW, Novitzky D, Grover FL, for the Veterans Affairs ROOBY Study Group. On-pump versus off-pump CABG. *N Engl J Med* 2010;362:851-4.

Table 1: ROOBY Trial Sensitivity Analyses

|                                                                                                   | Short-Term Composite Endpoint* |                      | p-value | Short-Term Composite Endpoint*  |                                | p-value | One-Year Composite Endpoint** |                      | p-value | One-Year Composite Endpoint**   |                                | p-value |
|---------------------------------------------------------------------------------------------------|--------------------------------|----------------------|---------|---------------------------------|--------------------------------|---------|-------------------------------|----------------------|---------|---------------------------------|--------------------------------|---------|
|                                                                                                   | Off-Pump<br>All Cases          | On-Pump<br>All Cases |         | Off-Pump<br>Cases Not Converted | On-Pump<br>Cases Not Converted |         | Off-Pump<br>All Cases         | On-Pump<br>All Cases |         | Off-Pump<br>Cases Not Converted | On-Pump<br>Cases Not Converted |         |
| <b>Participating Surgeon Historical Off-Pump Volume</b>                                           | n = 1071                       | n = 1067             |         | n=938                           | n = 1029                       |         | n = 1030                      | n = 1019             |         | n = 901                         | n = 984                        |         |
| <= 50 Off Pump Cases                                                                              | 29/442 (6.6%)                  | 21/429 (4.9%)        | 0.13    | 16/355 (4.5%)                   | 21/426 (4.9%)                  | 0.96    | 45/434 (10.4%)                | 33/413 (8.0%)        | 0.07    | 36/350 (10.3%)                  | 32/410 (7.8%)                  | 0.09    |
| > 50 Off Pump Cases                                                                               | 44/629 (7%)                    | 35/638 (5.5%)        |         | 34/583 (5.8%)                   | 34/603 (5.6%)                  |         | 55/596 (9.2%)                 | 43/606 (7.1%)        |         | 47/551 (8.5%)                   | 38/574 (6.6%)                  |         |
| < 100 Off Pump Cases                                                                              | 40/598 (6.7%)                  | 29/592 (4.9%)        | 0.13    | 25/498 (5.0%)                   | 29/586 (4.9%)                  | 0.96    | 58/584 (9.9%)                 | 47/567 (8.3%)        | 0.07    | 47/487 (9.7%)                   | 45/561 (8.0%)                  | 0.09    |
| => 100 Off Pump Cases                                                                             | 33/473 (7.0%)                  | 27/475 (5.7%)        |         | 25/440 (5.7%)                   | 26/443 (5.9%)                  |         | 42/446 (9.4%)                 | 29/452 (6.4%)        |         | 36/414 (8.7%)                   | 25/423 (5.9%)                  |         |
| <b>Primary Surgeon Role</b>                                                                       |                                |                      |         |                                 |                                |         |                               |                      |         |                                 |                                |         |
| Resident as Primary Surgeon                                                                       | 42/611 (6.9%)                  | 31/702 (4.4%)        | 0.05    | 30/529 (5.7%)                   | 31/681 (4.6%)                  | 0.43    | 10.7% (n = 62/577)            | 7.8% (n= 52/667)     | 0.08    | 53/499 (10.6%)                  | 48/647 (7.4%)                  | 0.06    |
| Attending as Primary Surgeon                                                                      | 35/491 (7.1%)                  | 29/395 (7.3%)        | 0.90    | 23/436 (5.3%)                   | 28/376 (7.4%)                  | 0.25    | 8.9% (n = 43/483)             | 6.8% (n = 26/381)    | 0.31    | 34/428 (7.9%)                   | 24/364 (6.6%)                  | 0.50    |
| <b>High Risk Patient Sub-Groups</b>                                                               |                                |                      |         |                                 |                                |         |                               |                      |         |                                 |                                |         |
| Octogenarians (age =>80 years)                                                                    | 5/30 (16.7%)                   | 1/27 (3.7%)          | 0.19    | 2/23 (8.7%)                     | 1/21 (4.8%)                    | 1.00    | 5/30 (16.7%)                  | 2/27 (7.4%)          | 0.43    | 2/23 (8.7%)                     | 1/21 (4.8%)                    | 1.00    |
| Baseline Chronic Obstructive Pulmonary Disease (COPD)                                             | 16/220 (7.3%)                  | 18/238 (7.6%)        | 1.00    | 11/94 (5.7%)                    | 60/1056 (7.4%)                 | 0.56    | 21/220 (9.5%)                 | 17/238 (7.1%)        | 0.40    | 16/181 (8.8%)                   | 15/223 (6.7%)                  | 0.46    |
| Baseline Peripheral Vascular Disease (PVD)                                                        | 21/179 (11.7%)                 | 14/163 (8.6%)        | 0.38    | 13/153 (8.5%)                   | 14/152 (9.2%)                  | 0.84    | 22/179 (12.3%)                | 15/173 (9.2%)        | 0.39    | 18/145 (12.4%)                  | 13/146 (8.9%)                  | 0.35    |
| Baseline Cerebrovascular Accidents (CVA)                                                          | 9/82 (11.0%)                   | 10/88 (11.4%)        | 1.00    | 5/72 (6.9%)                     | 9/80 (4.2%)                    | 0.41    | 4/82 (4.9%)                   | 9/88 (10.2%)         | 0.25    | 3/69 (4.3%)                     | 7/77 (9.1%)                    | 0.33    |
| Baseline Diabetes (Oral/Insulin Agents)                                                           | 40/470 (8.5%)                  | 20/491 (4.1%)        | 0.01    | 28/410 (6.8%)                   | 20/473 (4.2%)                  | 0.10    | 46/470 (9.8%)                 | 34/491 (6.9%)        | 0.13    | 37/392 (9.4%)                   | 31/454 (6.8%)                  | 0.17    |
| Baseline High Serum Creatinine (> 1.5 mg/dl)                                                      | 13/94 (13.8%)                  | 11/79 (13.9%)        | 1.00    | 9/82 (11.0%)                    | 11/73 15.1%)                   | 0.48    | 14/94 (14.9%)                 | 7/79 (8.9%)          | 0.25    | 12/79 (53.0%)                   | 7/70 (47.0%)                   | 0.46    |
| <b>Saphenous Vein Graft (SVG) Harvest Approaches<br/>(For Patients with at least 1 SVG Graft)</b> | n = 459                        | n = 435              |         | n = 403                         | n = 429                        |         | n = 458                       | n = 433              |         | n = 402                         | n = 428                        |         |
| Endoscopic Vein Harvest (EVH)                                                                     | 6/175 (3.4%)                   | 6/166 (3.6%)         | 0.43    | 5/157 (3.2%)                    | 6/164 (3.7%)                   | 1.00    | 17/175 = 9.7%                 | 11/165 = 6.7%        | 0.33    | 15/157 (9.6%)                   | 11/163 (6.7%)                  | 0.42    |

**Legend:**  
 \*\*\* The short-term primary endpoint was a composite of mortality or major morbidity (reoperation, new mechanical support, cardiac arrest, coma, stroke, or renal failure requiring dialysis) occurring within 30 days of surgery or prior to discharge, whichever was later.  
 \*\*\*\* The long-term primary composite endpoint was 1-year major adverse cardiovascular events (MACE) consisting of all-cause death, 30-day to 1-yr non-fatal MI, or 30-day to 1-yr repeat revascularization
